# Supplementary material for: Motor Performance in Male Youth Soccer Players: A Systematic Review of Longitudinal Studies
Source: MDPI journal article supplement (doi:10.3390/sports9040053), 2021-04-19
Supplement: s1 [file s1]

**Electronic Supplementary Material Table S1.** Full search strategy for each database with arguments presented as they were used.

**PubMed**

("football"[All Fields] OR "soccer"[All Fields]) AND ("youth"[All Fields] OR "young"[All Fields] OR "player"[All Fields] OR "athlete"[All Fields]) AND ("motor performance"[All Fields] OR "physical performance"[All Fields]) AND "longitudinal"[All Fields]

**Web of Science**

((football OR soccer) AND (youth OR young OR player OR athlete) AND (motor performance OR physical performance) AND (longitudinal)) - Refined by "Document Types": Article

**SCOPUS**

TITLE-ABS-KEY((football OR soccer) AND ( youth OR young OR player OR athlete) AND ("motor performance""physical performance") AND longitudinal)
