# Supplementary material for: Motor Performance in Male Youth Soccer Players: A Systematic Review of Longitudinal Studies
Source: MDPI journal article supplement (doi:10.3390/sports9040053), 2021-04-19
Supplement: s1 [file s1]

Electronic Supplementary Material Table S2. Scores attributed to each study according to twelve criteria used in evaluating methodological quality

| Cited | Study                              | Q1 | Q2 | Q3 | Q4 | Q5 | Q6 | Q7 | Q8 | Q9 | Q10 | Total ( $\Sigma$ ) | Percent | Quality    |
|-------|------------------------------------|----|----|----|----|----|----|----|----|----|-----|--------------------|---------|------------|
| 17    | (Philippaerts et al., 2006)        | 2  | 2  | 0  | 1  | 1  | 1  | 2  | 2  | 0  | 2   | 13                 | 65%     | [moderate] |
| 18    | (Huijgen et al., 2010)             | 2  | 1  | 1  | 2  | 2  | 2  | 2  | 0  | 2  | 0   | 14                 | 70%     | [moderate] |
| 48    | (Mirkov et al., 2010)              | 2  | 1  | 1  | 2  | 2  | 1  | 2  | 2  | 2  | 2   | 17                 | 85%     | [high]     |
| 40    | (Roescher et al., 2010)            | 2  | 1  | 0  | 2  | 2  | 2  | 2  | 2  | 0  | 2   | 15                 | 75%     | [high]     |
| 39    | (Williams et al., 2011)            | 2  | 1  | 1  | 2  | 2  | 2  | 2  | 2  | 0  | 2   | 16                 | 80%     | [high]     |
| 45    | (Gonaus & Muller, 2012)            | 1  | 1  | 0  | 2  | 2  | 2  | 2  | 2  | 2  | 2   | 16                 | 80%     | [high]     |
| 25    | (Valente-dos-Santos, et al., 2012) | 2  | 2  | 0  | 2  | 2  | 2  | 2  | 2  | 2  | 2   | 18                 | 90%     | [high]     |
| 19    | (Valente-dos-Santos, et al., 2012) | 2  | 1  | 0  | 2  | 2  | 2  | 2  | 0  | 0  | 0   | 11                 | 55%     | [moderate] |
| 26    | (Valente-dos-Santos, et al., 2012) | 2  | 1  | 1  | 2  | 2  | 2  | 2  | 2  | 2  | 0   | 16                 | 80%     | [high]     |
| 27    | (Valente-dos-Santos, et al., 2012) | 2  | 2  | 1  | 1  | 2  | 2  | 2  | 2  | 2  | 2   | 18                 | 90%     | [high]     |
| 41    | (Huijgen et al., 2013)             | 2  | 1  | 0  | 2  | 2  | 2  | 2  | 2  | 2  | 2   | 17                 | 85%     | [high]     |
| 42    | (Carvalho et al., 2014)            | 2  | 1  | 1  | 2  | 2  | 2  | 2  | 2  | 2  | 0   | 16                 | 80%     | [high]     |
| 31    | (Deprez et al., 2014)              | 2  | 2  | 0  | 1  | 2  | 2  | 2  | 2  | 2  | 2   | 17                 | 85%     | [high]     |
| 28    | (Valente-dos-Santos, et al., 2014) | 2  | 2  | 0  | 2  | 2  | 2  | 2  | 2  | 1  | 2   | 17                 | 85%     | [high]     |
| 29    | (Valente-dos-Santos, et al., 2014) | 2  | 2  | 0  | 2  | 2  | 2  | 2  | 0  | 1  | 2   | 15                 | 75%     | [high]     |
| 36    | (Wrigley et al., 2014)             | 2  | 1  | 2  | 1  | 2  | 2  | 2  | 2  | 2  | 2   | 18                 | 90%     | [high]     |
| 24    | (Bidaurrazaga-Letona et al., 2015) | 2  | 1  | 0  | 2  | 1  | 2  | 2  | 2  | 0  | 2   | 14                 | 70%     | [moderate] |
| 32    | (Deprez, et al., 2015)             | 2  | 1  | 0  | 2  | 2  | 2  | 2  | 2  | 2  | 2   | 17                 | 85%     | [high]     |
| 33    | (Deprez, et al., 2015)             | 2  | 2  | 0  | 1  | 2  | 2  | 2  | 2  | 0  | 2   | 15                 | 75%     | [high]     |
| 34    | (Deprez, et al., 2015)             | 2  | 2  | 0  | 2  | 2  | 2  | 2  | 2  | 2  | 2   | 18                 | 90%     | [high]     |
| 46    | (Forsman et al., 2016)             | 2  | 2  | 0  | 2  | 2  | 1  | 2  | 2  | 2  | 2   | 17                 | 85%     | [high]     |
| 20    | (Francioni et al., 2016)           | 2  | 1  | 2  | 1  | 2  | 2  | 2  | 2  | 0  | 0   | 14                 | 70%     | [moderate] |
| 21    | (Zuber et al., 2016)               | 0  | 2  | 1  | 2  | 1  | 2  | 2  | 0  | 2  | 2   | 14                 | 70%     | [moderate] |
| 43    | (Carvalho et al., 2017)            | 2  | 1  | 1  | 1  | 2  | 2  | 2  | 1  | 2  | 2   | 16                 | 80%     | [high]     |
| 35    | (Fransen et al., 2017)             | 2  | 1  | 0  | 1  | 2  | 1  | 2  | 2  | 2  | 2   | 15                 | 75%     | [high]     |
| 22    | (Rebelo-Goncalves et al., 2017)    | 1  | 2  | 0  | 2  | 2  | 2  | 0  | 1  | 0  | 2   | 12                 | 60%     | [moderate] |
| 44    | (Francioni et al., 2018)           | 2  | 2  | 1  | 1  | 2  | 2  | 2  | 2  | 2  | 0   | 16                 | 80%     | [high]     |
| 39    | (Coutinho et al., 2018)            | 2  | 2  | 1  | 2  | 2  | 2  | 2  | 2  | 2  | 2   | 19                 | 95%     | [high]     |
| 47    | (Leyhr et al., 2018)               | 2  | 2  | 2  | 1  | 2  | 2  | 2  | 0  | 1  | 2   | 16                 | 80%     | [high]     |

|    |                        |   |   |   |   |   |   |   |   |   |   |    |     |            |
|----|------------------------|---|---|---|---|---|---|---|---|---|---|----|-----|------------|
| 23 | (Bennett et al., 2019) | 1 | 2 | 1 | 1 | 2 | 1 | 1 | 1 | 2 | 2 | 14 | 70% | [moderate] |
| 37 | (Moran et al., 2020)   | 1 | 2 | 2 | 2 | 1 | 2 | 2 | 2 | 2 | 2 | 18 | 90% | [high]     |
| 38 | (Saward et al., 2020)  | 2 | 2 | 0 | 2 | 2 | 2 | 2 | 2 | 2 | 2 | 18 | 90% | [high]     |
